# Supplementary material for: Experiences and perspectives of cancer stakeholders regarding COVID‐19 vaccination
Source: PubMed Central journal article supplement — Asia Pac J Clin Oncol. 2022 Jul 18:10.1111/ajco.13808. Online ahead of print. doi: 10.1111/ajco.13808 (PMC9349780; doi:10.1111/ajco.13808), 2022-07-18
Supplement: AJCO-9999-0-s001.pdf [file AJCO-9999-0-s001.pdf]

**Follow-up Interview questions: Patients**

1. As a cancer patient/survivor, can you tell me about your experience of cancer care since this most recent outbreak of COVID-19 in Australia?  
    Prompt: Concerns, clinical care, family support, your behaviour, any changes?
  2. Has anything changed in the way you interact with your cancer care team since your last interview?  
    Prompt: telehealth, partner attendance at appointments
  3. Has this recent outbreak of COVID-19 influenced decisions made about your treatment and/or follow up, or your access to support and care?
    - a. If yes, how has this impacted you?
    - b. Do you think things could have been done differently?
  4. How has this recent outbreak of COVID-19 impacted on the level of support your family and friends have been able to provide?
  5. How has this recent outbreak of COVID-19 impacted on you emotionally?
  6. Do you think COVID-19 has made it harder or easier to adjust to cancer (survivorship)?
    - a. How?
    - b. What has helped you cope, and what has made it more difficult?
  7. What impact has this recent outbreak of COVID-19 had on your partner/family or others at home?
  8. Are you vaccinated against COVID-19?
    - a. Have your views on vaccination changed at all over the past few months?
    - b. How?
    - c. Have you had any recent discussions with your treatment team about vaccinations?
    - d. What did that involve?
- IF NOT vaccinated:
- a. Do you know how to access the vaccine? Are you concerned about being able to access the vaccine?
  - b. Do you have any concerns about the COVID vaccination for cancer patients?
  - c. Does your family have any concerns about the vaccination for you?
  - d. What information would you need to decide whether or not to vaccinate?
  - e. Do you have a preference for one vaccine over another? Why?
9. Is there anything that your cancer service, or the NSW or national government, could have done to make it easier for you in the context of the COVID-19 pandemic?
  10. Is there anything else you would like to tell me about the experience of being a cancer patient/survivor as the COVID-19 pandemic continues?

## Follow-up Interview questions: Family members

1. As the family member/ carer of a cancer patient/survivor, can you tell me about your experience of cancer care since this most recent outbreak of COVID-19 in Australia?  
Prompt: Concerns, clinical care, family support, your behaviour, any changes
  2. As a family member/ carer of a cancer patient/survivor, has your thinking about COVID-19 changed as a result of this most recent outbreak?
  3. Has anything changed in the way your family member, or you have interacted with the cancer care team since your last interview?
  4. Has this recent outbreak of COVID-19 influenced decisions made about your patient's treatment and/or follow up, or their access to support and care?
    - a. If yes, how has this impacted you?
    - b. Do you think things could have been done differently?
  5. How has this recent outbreak of COVID-19 impacted on *your* access to support and care?
    - a. If yes, how has this impacted you?
    - b. Do you think things could have been done differently?
  6. Have you been able to support your family member as much as you would have liked since this recent outbreak of COVID-19?
    - a. If limited - Was this due to any hospital policies?
    - b. Has this impacted your or your family member's emotional wellbeing?
  7. Overall, what impact do you think COVID-19 has had on you emotionally?
    - a. Do you think COVID has made it harder or easier to adjust to your patients cancer?
    - b. What has helped you cope, and what has made it more difficult?
  8. Are you vaccinated against COVID?
    - a. Have your views on vaccination changed at all over the past few months?
    - b. How?
    - c. Have you had any recent discussions with your family member's treatment team about vaccinations?
    - d. What was discussed?
- IF NOT vaccinated:
- a. Do you know how to access the vaccine? Are you concerned about being able to access the vaccine?
  - b. Do you have any concerns about the COVID vaccination for cancer patients? Or for yourself?
  - c. What information would you need to decide whether or not to vaccinate?
  - d. Do you have a preference for one vaccine over another? Why?
7. Is there anything else you would like to tell me about the experience of being the family member of a cancer patient/survivor during the COVID-19 pandemic?

## Follow-up Interview questions: Healthcare Professionals (all)

1. Can you tell me what has changed for you as an oncology healthcare professional, since this most recent outbreak of COVID-19 in Australia?  
Prompt: your concerns, role, clinical care (telehealth), health system changes, patient and family concerns and behaviour
2. Reflecting on the policy and practice changes that were implemented in your service and the health system in 2020:
  - a. Do you perceive they were effective in managing COVID risk (particularly considering this recent outbreak/new strain)?
  - b. Have any of the changes implemented since this recent outbreak been different to the changes implemented in 2020?
  - c. Have you seen any unforeseen consequences for patient care arise from any policy and practice changes?
3. Have you noticed any impacts on your patients due to this most recent Delta strain of COVID-19?
  - a. Prompt: clinically, emotionally
4. Since our last interview, have you noticed a change in the number of patients presenting, either new or people delaying follow up appointments?
  - a. Are these numbers different to pre-COVID numbers?
  - b. What do you think are the long-term implications of this?
  - c. Are you starting to see this (the implications) already?
5. As an oncology health care professional has your thinking about COVID-19 changed as a result of this most recent outbreak?
6. Has this most recent outbreak of COVID-19 influenced any treatment decisions you made?
  - a. If so, how?
  - b. What types of decisions?
7. How do you think you patients are feeling about the vaccinations?
  - a. Do you perceive perceptions have changed since our last interview?
  - b. Have your patients expressed any concerns about the COVID vaccination?
  - c. What information do you think your patients would need to decide whether to vaccinate?
  - d. Do you have any concerns in advising or recommending the vaccines to your cancer patients?
8. Overall, what impact do you think COVID-19 has had on you and other colleagues?
  - a. What has helped you cope and what has made it more difficult?
9. Is there anything else you would like to tell me about the experience of being an Oncology health professional as the COVID-19 pandemic continues/resolves?
