# Supplementary material for: Experiences and perspectives of cancer stakeholders regarding COVID‐19 vaccination
Source: PubMed Central journal article supplement — Asia Pac J Clin Oncol. 2022 Jul 18:10.1111/ajco.13808. Online ahead of print. doi: 10.1111/ajco.13808 (PMC9349780; doi:10.1111/ajco.13808), 2022-07-18
Supplement: AJCO-9999-0-s002.pdf [file AJCO-9999-0-s002.pdf]

### Follow-up Interview questions: Patients

1. As a cancer patient/survivor, can you tell me about your experience of cancer care over the past 6 months as the COVID-19 pandemic has continued/resolved?  
Prompt: Concerns, clinical care, family support, your behaviour, any changes?
2. Compared to where you were 6 months ago, how has your thinking changed about COVID-19 now, as a cancer patient/survivor?
3. Has anything else changed in the way you interact with your cancer care team in the past six months?
4. Looking back over the last 6 months, do you perceive COVID influenced decisions you and your cancer team made about your treatment and/or follow up?  
If yes, what do you think now about these decisions?
5. Thinking about the decisions made during COVID, would you change anything about the way those decisions were made, or the decision itself? Why, why not?
6. Throughout the COVID-19 pandemic, how was the majority of your cancer care delivered? Did you need to attend the hospital or were appointments via telehealth?
7. Over the last 6 months, how supported did you feel by your cancer care team?  
Did the amount of support you received change over time?
8. Over the last 6 months, how supported did you feel by your family and friends?  
Did the amount of support you received change over the last six months?  
If less/more support, do you perceive that having limited/more support impacted your emotional wellbeing?
9. Overall, what impact do you think COVID-19 has had on you emotionally? (If any),  
Do you still have any of those feelings?  
What has helped you cope, and what has made it more difficult?
10. What impact did COVID-19 have on your partner/family or others at home going through the cancer treatment with you?
11. How do you feel about the upcoming vaccinations? Is this something you and your family would consider? Why/why not?
  - a. Do you have any concerns about the COVID vaccination for cancer patients?
  - b. Have you had any discussions with your treatment team about vaccinations?
  - c. Do you know how to access the vaccine? Are you concerned about being able to access the vaccine?
  - d. What information would you need to decide whether or not to vaccinate?
  - e. Is there anything you are worried about with the vaccine? What are these concerns and why?
  - f. Does your family have any concerns about the vaccination for you?
  - g. Do you have a preference for one vaccine over another? Why?

12. Is there anything else you would like to tell me about the experience of being a cancer patient/survivor as the COVID-19 pandemic impacts continue/resolve?

## Follow-up Interview questions: Family members

1. As the family member/ carer of a cancer patient, can you tell me about your experience of cancer care over the past 6 months as the COVID-19 pandemic has continued/resolved?  
Prompt: Concerns, clinical care, family support, your behaviour, any changes
2. Compared to where you were 6 months ago, how has your thinking changed about COVID-19 now, as a family member/ carer of a cancer patient?
3. Has anything else changed in the way your family member's or you have interacted with the cancer care team in the past six months?
4. Looking back over the last 6 months, do you perceive COVID influenced decisions you and your cancer team made about your treatment and/or follow up?  
If yes, what do you think now about these decisions?
5. Thinking about the decisions made during COVID, would you change anything about the way those decisions were made, or the decision itself? Why, why not?
6. How do you feel about COVID-19 now, as the family member of a cancer patient/survivor?
7. Over the last 6 months, were you able to support your family member as much as you would have liked?  
If limited - Was this due to any hospital policies? Has this continued? When did this occur/stop?  
If less/more support, do you perceive that having limited/more support impacted yours or your family members emotional wellbeing?
8. Overall, what impact do you think COVID-19 has had on you emotionally? (If any), do you still have any of those feelings? What has helped you cope, and what has made it more difficult?
9. How did you feel about the easing of restrictions?
10. How do you feel about the upcoming vaccinations? Is this something you and your family would consider? Why/why not?
  - a. Do you have any concerns about the COVID vaccination for cancer patients?
  - b. Have you had any discussions with your family members treatment team about vaccinations? If yes, has the cancer specialist discussed whether there is any need for you to be vaccinated at the same time as the patient?
  - c. Is there anything else you are worried about with the vaccine? What are these concerns and why?
11. Is there anything else you would like to tell me about the experience of being the family member of a cancer patient/survivor as the COVID-19 pandemic impacts continue/resolve?

## Follow-up Interview questions: Healthcare Professionals (all)

1. Can you tell me what has changed for you as an oncology healthcare professional, over the past 6 months as the COVID-19 pandemic has continued/resolved?  
Prompt: your concerns, role, clinical care (telehealth), health system changes, patient and family concerns and behaviour
2. Reflecting on the policy and practice changes that were implemented in your Oncology Service and the health system as a whole, during the COVID-19 pandemic?  
How effective do you perceive these changes to be in managing COVID risk?  
Did any unforeseen consequences for patient care arise from these policy and practice changes? If yes, how long did it take for these issues to be resolved?  
How were they resolved?  
How have your patients adapted to these policy and practice changes? Have they liked/disliked these changes?  
Are these changes still in place?
3. Compared to where you were 6 months ago, how has your thinking about COVID-19 changed, as an oncology healthcare professional?
4. Were there any positives that arose from COVID-19, or any changes that we should continue into the future?
5. Looking back over the last 6 months do you perceive COVID influenced treatment decisions you made? If so how? What types of decisions?
6. Do you perceive there is likely to be any long-term consequences of COVID-19 in terms of cancer care?
7. Compared to 6 months ago, have you noticed a change in the number of patients presenting, either new or people delaying follow up appointments?  
Are these numbers different to pre-COVID numbers?  
What do you think are the long-term implications of this? Are you starting to see this (the implications) already?
13. How do you think you patients are feeling about the upcoming vaccinations? Is this something you think your patients and their family would consider? Why/why not?
  - a. Have your patients expressed any concerns about the COVID vaccination?
  - b. What information would do you think your patients would need to decide whether or not to vaccinate?
  - c. Do you have any concerns in advising or recommending the vaccines to your cancer patients?
8. Overall, what impact do you think COVID-19 has had on you and other colleagues?  
What has helped you cope, and what has made it more difficult?
9. How are your patients and their families responding to COVID-19 now, and how are they coping?
10. Compared to 6 months ago, how much communication are you having with the family members of your patients?

11. Did the easing of restrictions raise any concerns for you?
12. Is there anything else you would like to tell me about the experience of being an Oncology health professional as the COVID-19 pandemic continues/resolves?

## Follow-up Interview questions: non-government cancer agencies

1. Can you tell me what has changed for you as a member of a non-government cancer agency, over the past 6 months, as the COVID-19 pandemic continues/resolves?  
Prompt: your concerns, role, clinical care (telehealth), patient and family concerns and behavior.
2. Overall, what impact do you think COVID-19 has had on patients and family members? What has helped them cope, and what has made it more difficult?
3. What do you think now about the care and support you and your agency gave to cancer patients and their families during the COVID-19 pandemic?  
Looking back, was that care and support optimal? Why/why/not? How would you change it?
4. What do you think now about the policy and practice changes that were implemented at your non-government cancer agency, during the COVID-19 pandemic?  
Would you think these policies should be used again if a similar pandemic arose? Any changes? Why/why not?  
Did any issues arise from these policy and practice changes? If yes, how long did it take for these issues to be resolved? How were they resolved?  
How have patients adapted to these policy and practice changes? Have they liked/disliked these changes?  
Are these changes still in place?
5. At an organisational level, have you been impacted by any changes as a result of COVID over the last 6 months?  
Prompt: Some organisations reported a reduction in fund raising that they used to provide services. Did this impact you at all?
6. Compared to where you were 6 months ago, how has your thinking about COVID-19 changed, as a member of a non-government cancer agency ?
7. Compared to 6 months ago, how much communication are you having with patients and their families about COVID-19?
8. Were there any positives that arose from COVID-19, or any changes that we should continue into the future?
9. What support or information would benefit patients and their families, if a similar pandemic were to arise?
10. What support or information would benefit yourself and your colleagues, if a similar pandemic were to arise?
11. Have there been any unforeseen long-term consequences of COVID-19?
12. Compared to 6 months ago, have you noticed a change in the number of patients presenting to your organisation for help?  
Are these numbers different to pre-COVID numbers?

13. Did the easing of restrictions raise any concerns for you?
14. How do you think your patients are feeling about the upcoming vaccinations? Is this something you think your patients and their family would consider? Why/why not?
  - a. Have your patients expressed any concerns about the COVID vaccination?
  - b. What information would do you think your patients would need to decide whether or not to vaccinate?
15. Compared to 6 months ago, how much communication are you having with the family members of your patients?  
Have their concerns changed at all over the last 6 months?
16. Overall, what impact do you think COVID-19 has had on you and other colleagues?  
What has helped you cope, and what has made it more difficult?
17. Is there anything else you would like to tell me about the experience of being a member of a non-government cancer agency as the COVID-19 pandemic continues/resolves?
